# Supplementary material for: Inhibition of Transient Receptor Potential Melastatin 3 ion channels by G-protein βγ subunits
Source: eLife journal article supplement (doi:10.7554/elife.26147), 2017-08-15
Supplement: supp [file elife-26147-supp-v1.zip]

Archive with 9 entries (9 files):
- elife_poa_e26147_Figure_4_Figure_Supplement_3.pdf
- elife_poa_e26147_Figure_1_Figure_Supplement_2.pdf
- elife_poa_e26147_Figure_1_Figure_Supplement_1.pdf
- elife_poa_e26147_Transparent_Reporting_File.pdf
- elife_poa_e26147_Figure_3_Figure_Supplement_1.pdf
- elife_poa_e26147_Figure_4_Figure_Supplement_1.pdf
- elife_poa_e26147_Figure_2_Figure_Supplement_1.pdf
- elife_poa_e26147_Figure_1_Figure_Supplement_3.pdf
- elife_poa_e26147_Figure_4_Figure_Supplement_2.pdf
