# Supplementary material for: Inhibition of Transient Receptor Potential Melastatin 3 ion channels by G-protein βγ subunits
Source: eLife journal article supplement (doi:10.7554/elife.26147), 2017-08-15
Supplement: supp [file elife-26147-supp-v1.zip › elife_poa_e26147_Figure_1_Figure_Supplement_1.pdf]

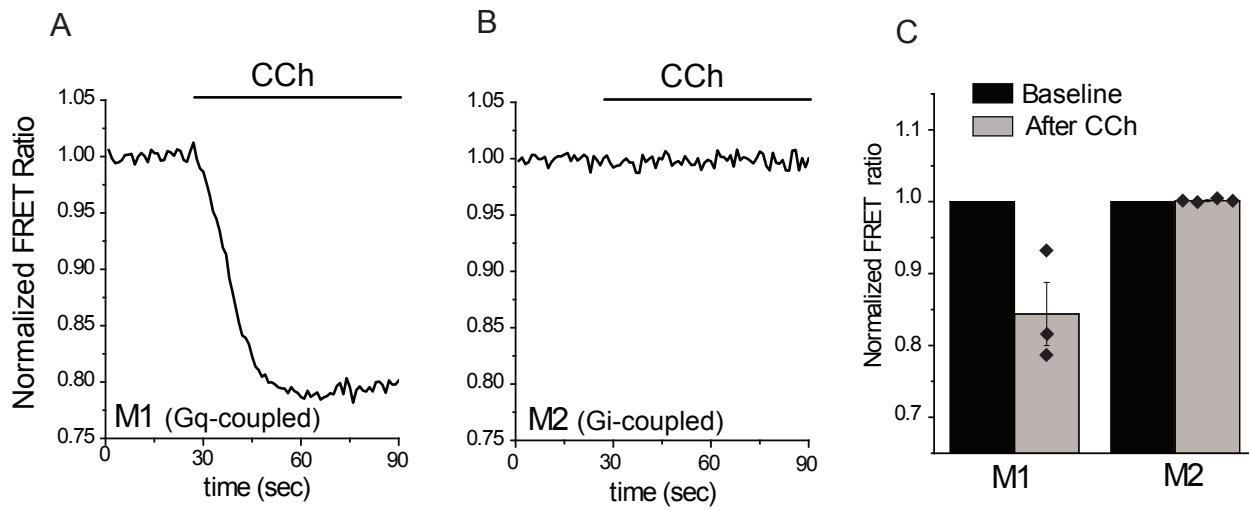

**Figure 1 - figure supplement 1**

**Activation of M1, but not M2 muscarinic receptors induces PI(4,5)P<sub>2</sub> hydrolysis**

FRET-based PI(4,5)P<sub>2</sub> measurements were performed as described in the Materials and Methods section, downward deflection of the FRET ratio curve indicates a decrease in plasma membrane PI(4,5)P<sub>2</sub> levels. (A-B) Representative FRET measurements in HEK cells expressing the CFP- and YFP-tagged tubby domain PI(4,5)P<sub>2</sub> sensors in HEK cells co-transfected with M1 (A) and M2 (B) muscarinic receptors. (C) Summary data for the FRET measurements (n=3 for M1 and n=4 for M2).
