# Supplementary material for: Inhibition of Transient Receptor Potential Melastatin 3 ion channels by G-protein βγ subunits
Source: eLife journal article supplement (doi:10.7554/elife.26147), 2017-08-15
Supplement: supp [file elife-26147-supp-v1.zip › elife_poa_e26147_Figure_2_Figure_Supplement_1.pdf]

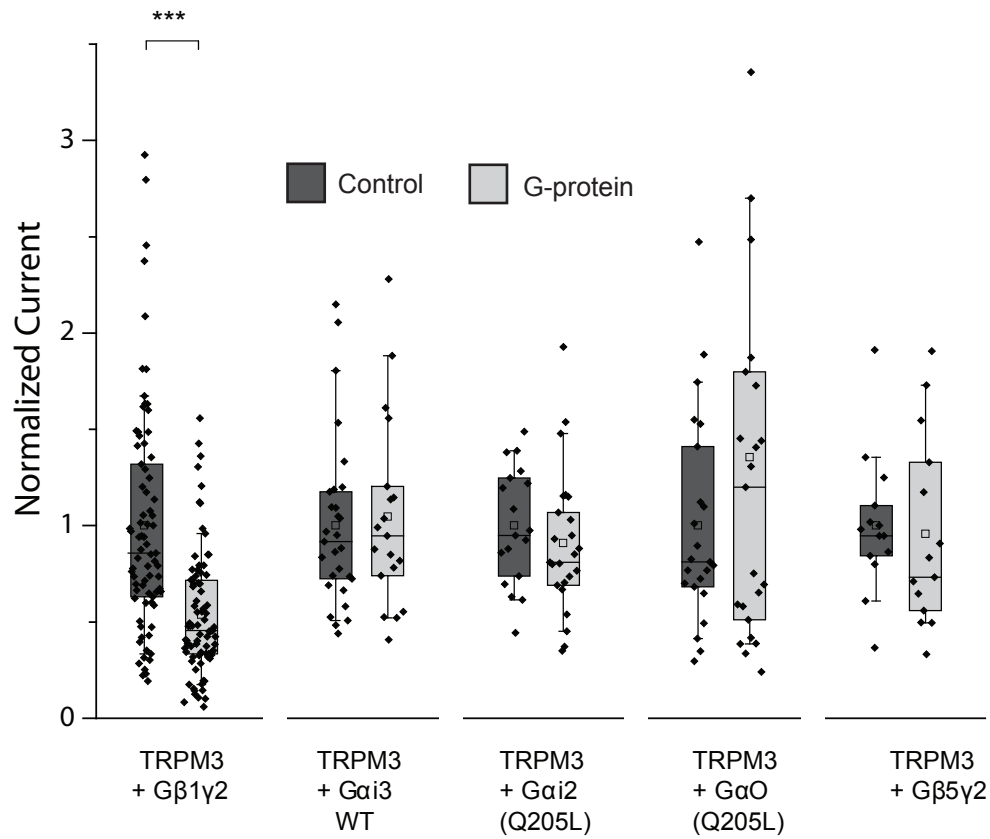

**Figure 2 - figure supplement 1**

### Co-expressed Gβ1γ2, but not Gai or Gao inhibits TRPM3 currents

Box and scatter plot of data from Figure 2D. Boxes show 25th and 75th percentiles, whiskers 90 and 10 percentiles.
