# Supplementary material for: Inhibition of Transient Receptor Potential Melastatin 3 ion channels by G-protein βγ subunits
Source: eLife journal article supplement (doi:10.7554/elife.26147), 2017-08-15
Supplement: supp [file elife-26147-supp-v1.zip › elife_poa_e26147_Figure_3_Figure_Supplement_1.pdf]

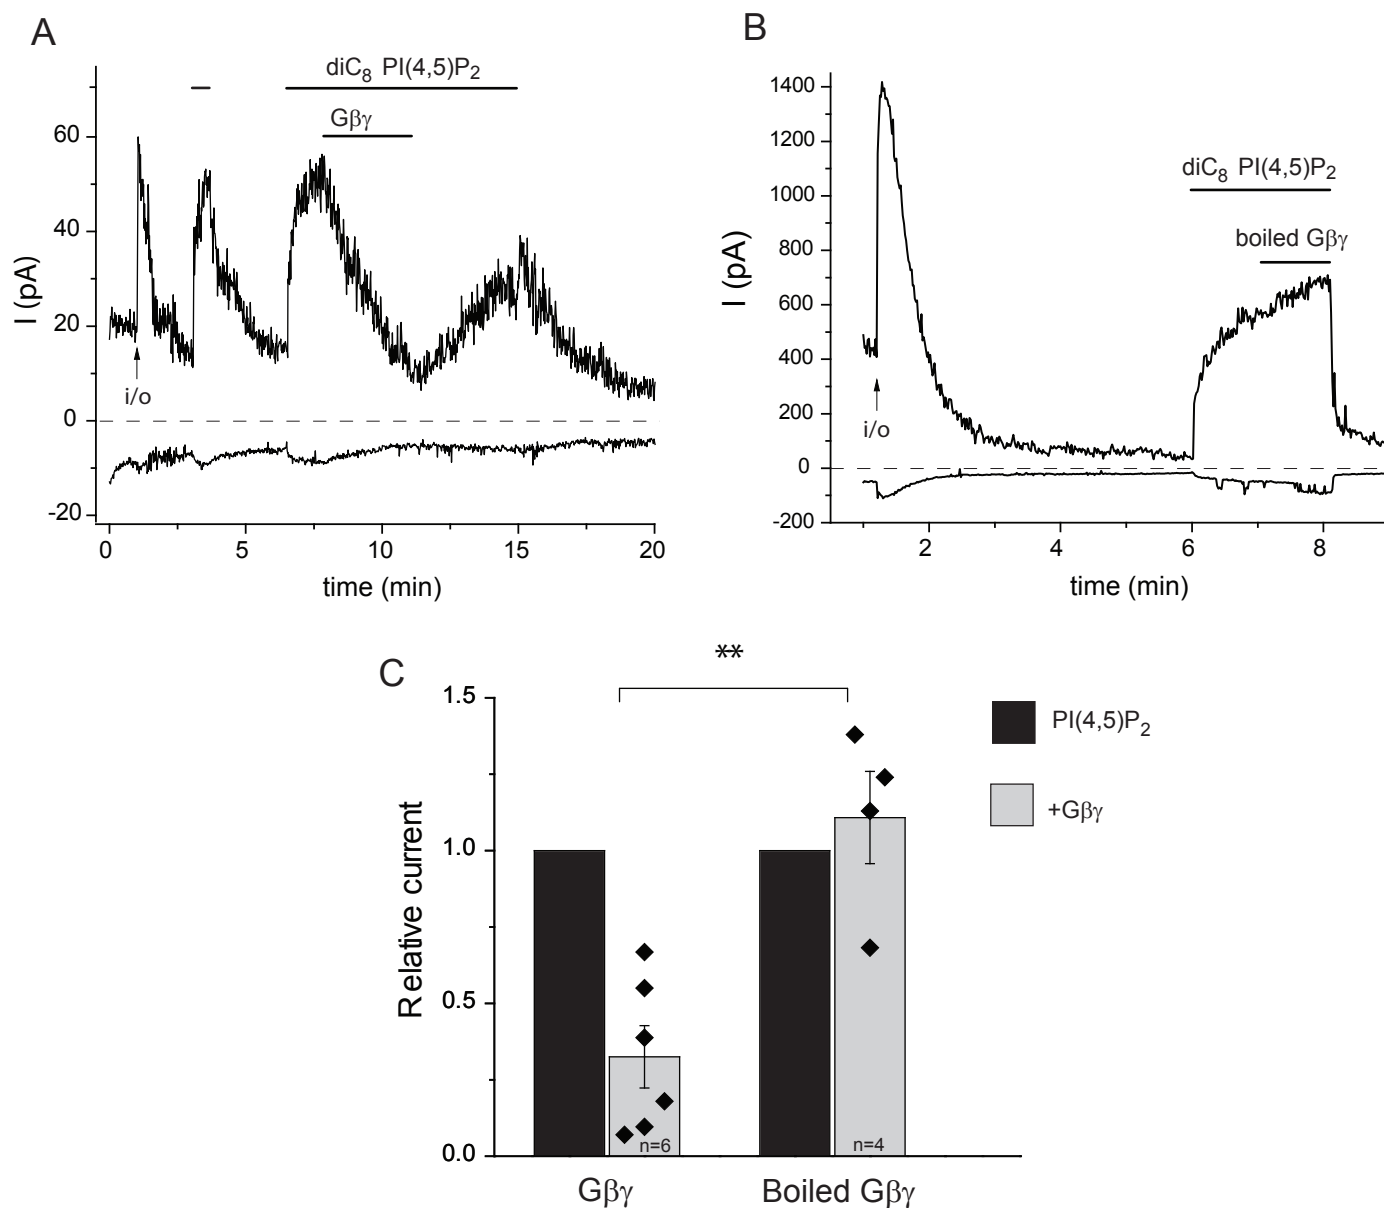

**Figure 3 - figure Supplement 1**

### **Inhibition TRPM3 in excised patches by $\text{G}\beta\gamma$ purified from bovine brain**

Excised inside-out patch clamp experiments were performed in *Xenopus* oocytes expressing hTRPM3, with 100  $\mu\text{M}$  PregS in the patch pipette, as described in Materials and Methods and as shown in **Figure 3**. The establishment of the inside-out (i/o) configuration is marked with the arrow, the application of 25  $\mu\text{M}$   $\text{diC}_8 \text{ PI}(4,5)\text{P}_2$  is shown by the horizontal line. (A) the effect of intact  $\text{G}\beta 1\gamma 2$  (50 ng/ml), (B) the effect of  $\text{G}\beta 1\gamma 2$  boiled for 15 min before the experiment. (C) Summary of the data. Statistical analysis was performed with two sample t-test  $**p=0.002$
