# Supplementary material for: Inhibition of Transient Receptor Potential Melastatin 3 ion channels by G-protein βγ subunits
Source: eLife journal article supplement (doi:10.7554/elife.26147), 2017-08-15
Supplement: supp [file elife-26147-supp-v1.zip › elife_poa_e26147_Figure_4_Figure_Supplement_1.pdf]

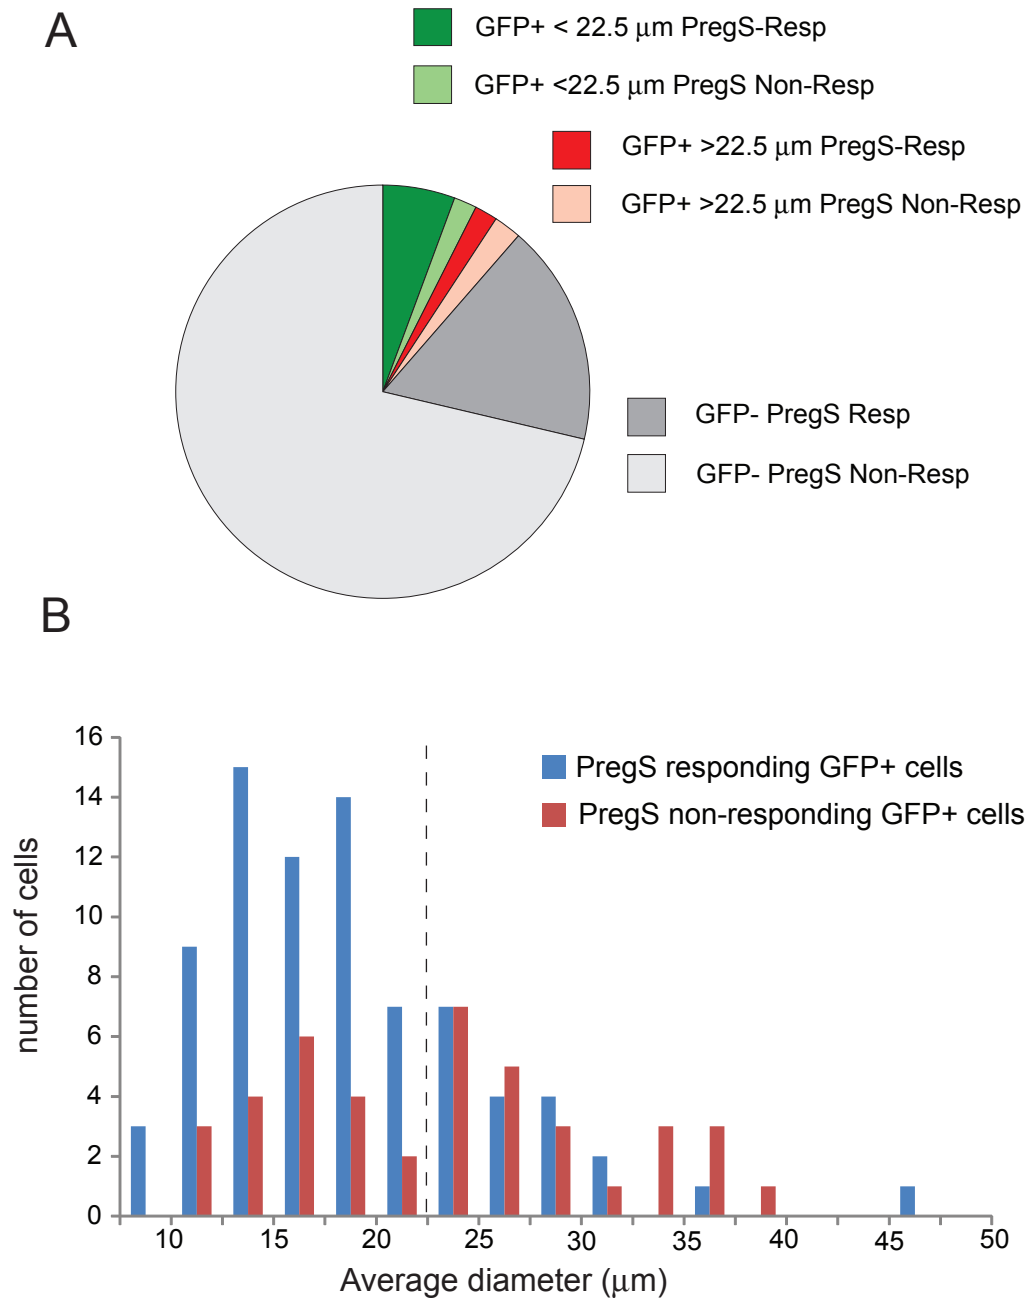

**Figure 4 - figure supplement 1**

**Distribution of PregS responsive and non-responsive DRG neurons of TRPM8-GFP reporter mice**

(A) Pie chart of PregS-responsive and non-responsive neurons, based on analysis of  $\text{Ca}^{2+}$  responses to 12.5  $\mu\text{M}$  PregS of 1063 KCl responsive cells. The GFP-positive population was divided into smaller cells (<22.5  $\mu\text{m}$ ) and larger cells (>22.5  $\mu\text{m}$ ); average diameter of the cells was determined by the Image Master 5 software. (B) Size distribution of PregS responsive and non-responsive GFP-positive cells; dashed line shows the 22.5  $\mu\text{m}$  cutoff for smaller and larger cells.
