# Supplementary material for: Inhibition of Transient Receptor Potential Melastatin 3 ion channels by G-protein βγ subunits
Source: eLife journal article supplement (doi:10.7554/elife.26147), 2017-08-15
Supplement: supp [file elife-26147-supp-v1.zip › elife_poa_e26147_Figure_4_Figure_Supplement_2.pdf]

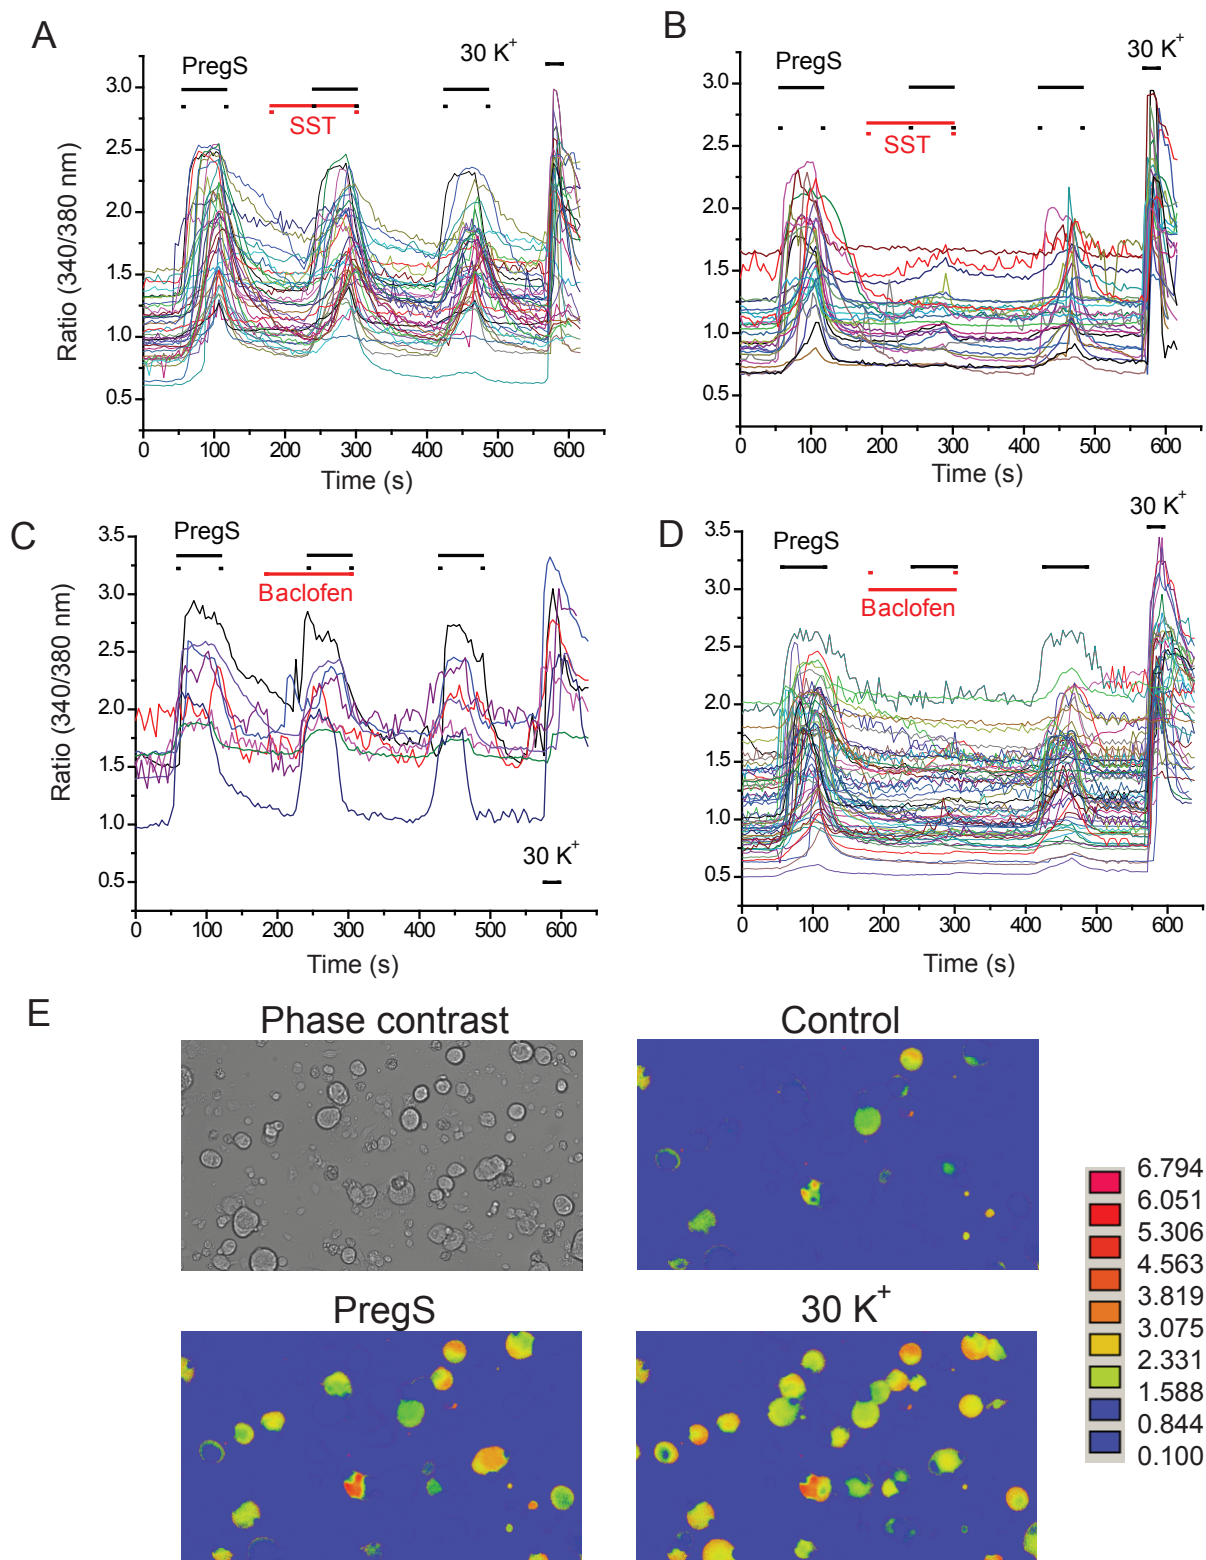

**Figure 4 – Figure Supplement 2:**

### Individual traces and representative images for Ca<sup>2+</sup> imaging experiments

(A,B) Individual 340/380 nm ratios traces for Fura2-loaded DRG neurons; application of 12.5  $\mu$ M PregS and 1  $\mu$ M somatostatin (SST) are indicated by the horizontal lines. (A) SST non-responsive, (B) SST responsive cells. (C,D). Individual 340/380 nm ratio traces; application of 12.5  $\mu$ M PregS and 25  $\mu$ M baclofen are indicated by the horizontal lines, (C) baclofen non-responsive, (D) baclofen responsive cells. E representative images for responses to PregS and 30 mM KCl.
