# Supplementary material for: Inhibition of Transient Receptor Potential Melastatin 3 ion channels by G-protein βγ subunits
Source: eLife journal article supplement (doi:10.7554/elife.26147), 2017-08-15
Supplement: supp [file elife-26147-supp-v1.zip › elife_poa_e26147_Figure_4_Figure_Supplement_3.pdf]

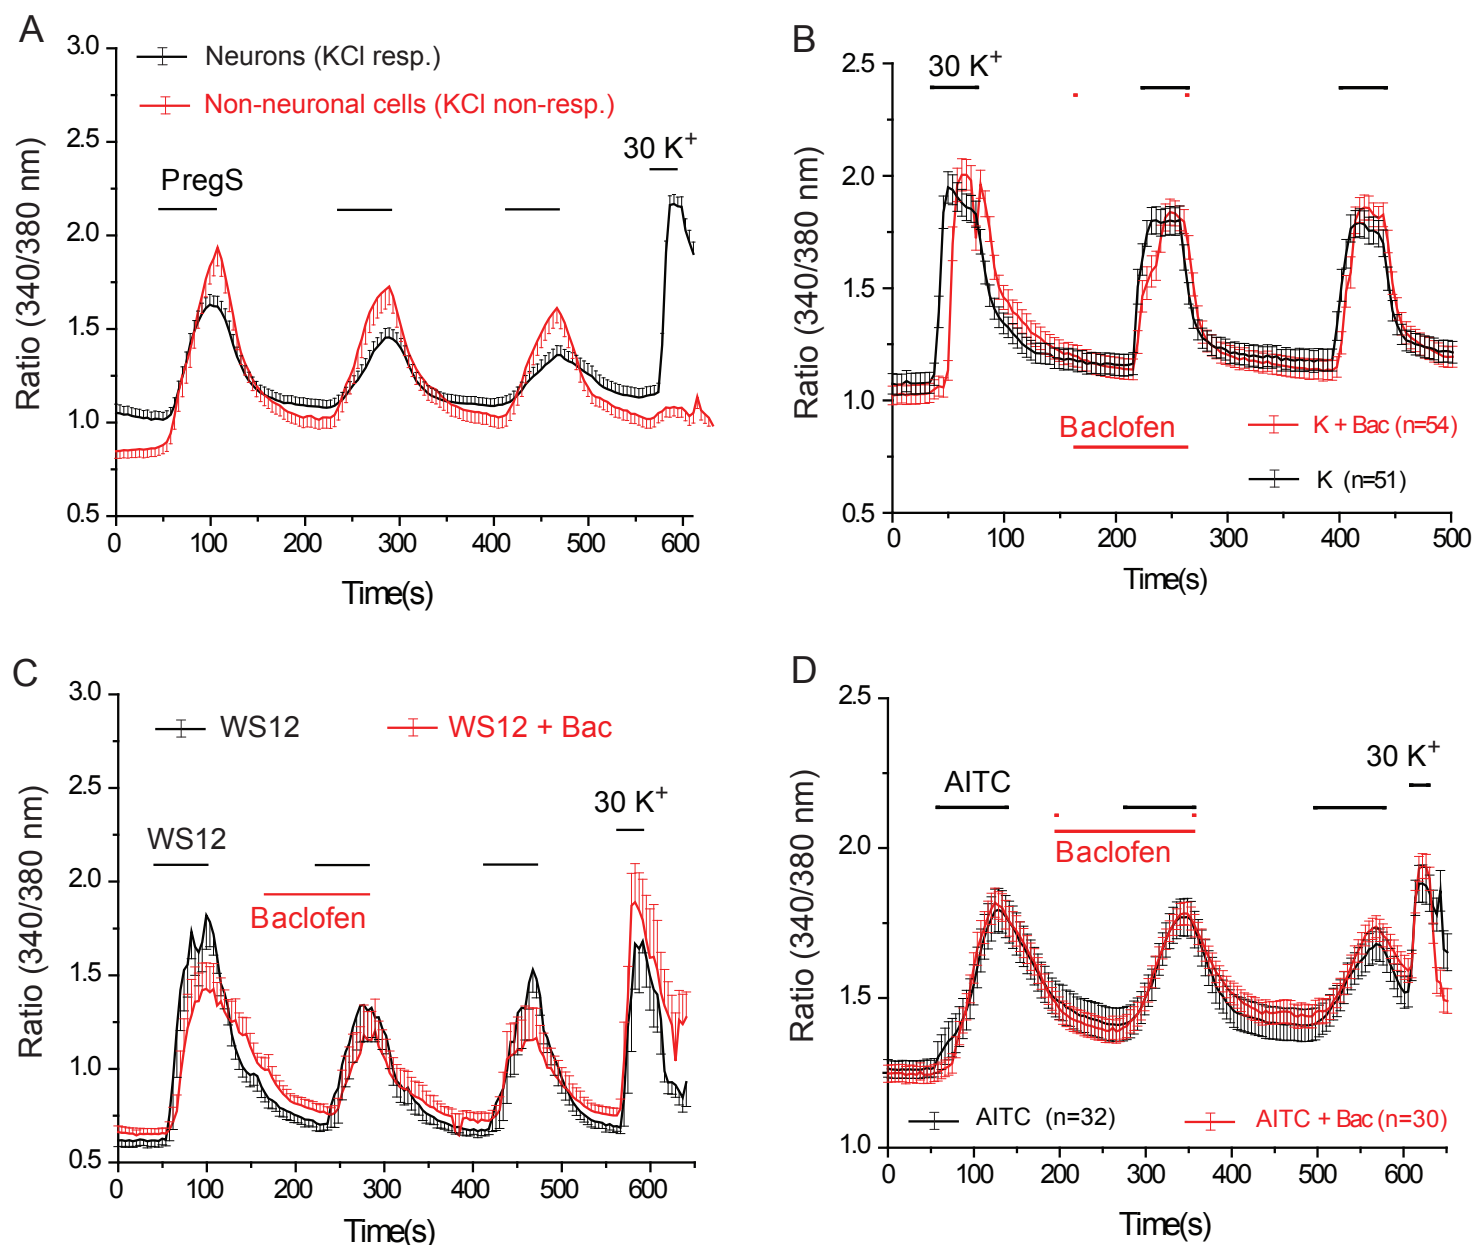

**Figure 4 – Figure Supplement 3:**

**Baclofen does not inhibit PregS-induced  $\text{Ca}^{2+}$  signals in non-neuronal cells, and  $\text{Ca}^{2+}$  signals in DRG neurons evoked by KCl, the TRPM8 agonist WS12, or the TRPA1 agonist AITC**

(A)  $\text{Ca}^{2+}$  signals (mean  $\pm$  SEM of 340/380 nm ratios) in Fura2-loaded KCl-responsive and KCl non-responsive cells induced by three consecutive applications of 12.5  $\mu\text{M}$  PregS. The  $\text{Ca}^{2+}$  traces for non-neuronal (KCl-non-responsive) cells is an average of control and baclofen (25  $\mu\text{M}$ ) treated cells; the data were pooled, because the traces were indistinguishable; control trace for neurons without the application of baclofen is shown for reference (B) Lack of effect of baclofen on  $\text{Ca}^{2+}$  signals induced by 30 mM KCl (C)  $\text{Ca}^{2+}$  signals induced by three consecutive applications of 1  $\mu\text{M}$  WS12 in control cells (black) and in cells where the second WS12 application was preceded by 25  $\mu\text{M}$  baclofen, as indicated by the horizontal lines, n=6 for both control and baclofen treated cells. (D)  $\text{Ca}^{2+}$  signals induced by three consecutive applications of 25  $\mu\text{M}$  allyl isothiocyanate (AITC) in control cells (black) and in cells where AITC application was preceded by 25  $\mu\text{M}$  baclofen.
